# Supplementary material for: Enhanced Adsorption Capacity of Methylene Blue Dye onto Kaolin through Acid Treatment: Batch Adsorption and Machine Learning Studies
Source: MDPI journal article supplement (doi:10.3390/w16020243), 2024-01-10
Supplement: s1 [file s1]

## Supplementary material

**Figure S1** Structure of (a) methylene blue and (b) kaolinite DD3.

**Figure S2** Adsorption tests for the removal of MB on acid activated prepared materials, ( $C_0$  (MB) = 250 mg/L,  $m/V$  = 1 g/L, contact time 24 h,  $T = 25 \pm 3$  °C, and unadjusted pH).

**Figure S3** Point of zero charge ( $pH_{pzc}$ ) of DD3 and Treated-DD3.

**Figure S4** Plots showing the variation in the amount of MB adsorbed on DD3 and Treated-DD3 in the time range 0–60 min for the PSO model ( $m/V$  = 1 g/L,  $T = 25 \pm 3$  °C, and unadjusted pH), as a nonlinear expression.

**Figure S5** Multicollinearity test

**Figure S6** Residuals relating to the model established by the different techniques according to the estimated values: (a) Relationship between experimental data and the predicted data of samples, (b) Residue of errors, and (c) Instances distribution of errors, and (d) Frequency distribution of errors.

**Figure S7** MATLAB Interface: prediction of the adsorption quantity with GPR-PSO model.

**Table S1.** Maximum adsorption capacity ( $Q_{max}$  (mg/g) of MB by various adsorbents in other reports.

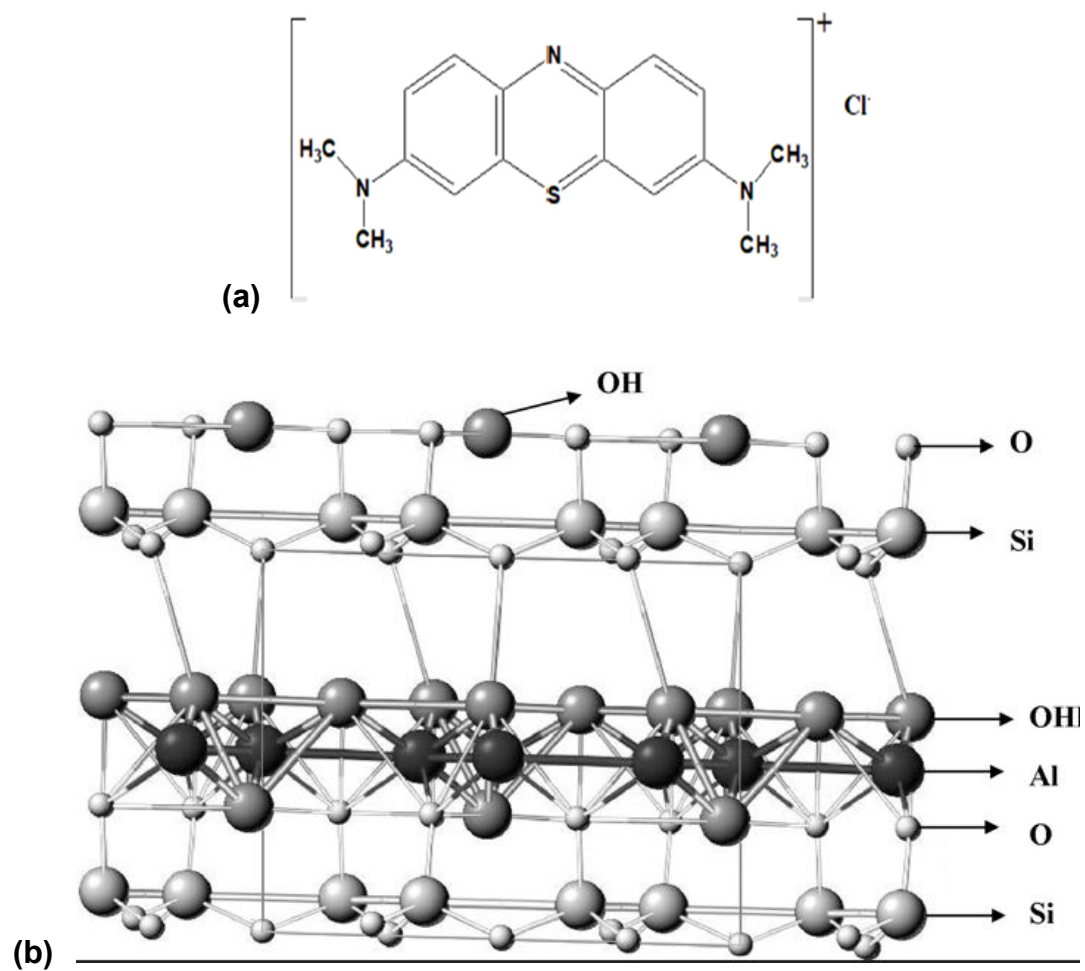

Figure S1

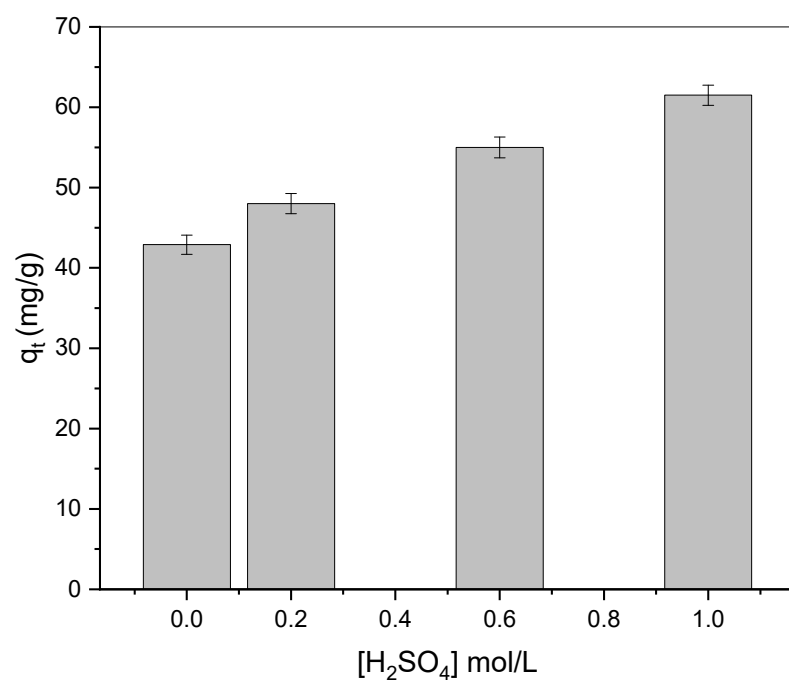

Figure S2

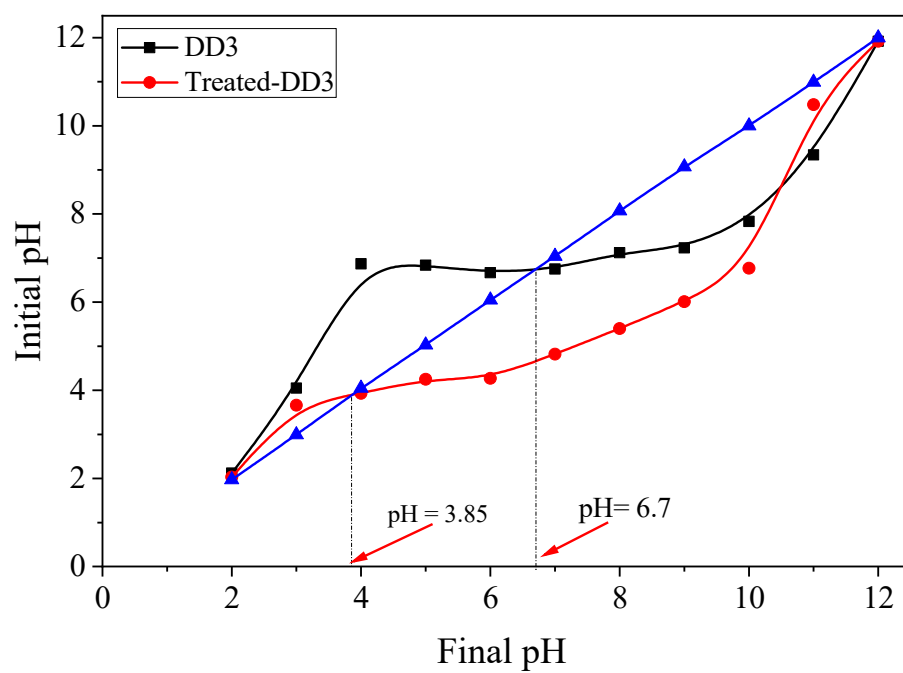

Figure S3

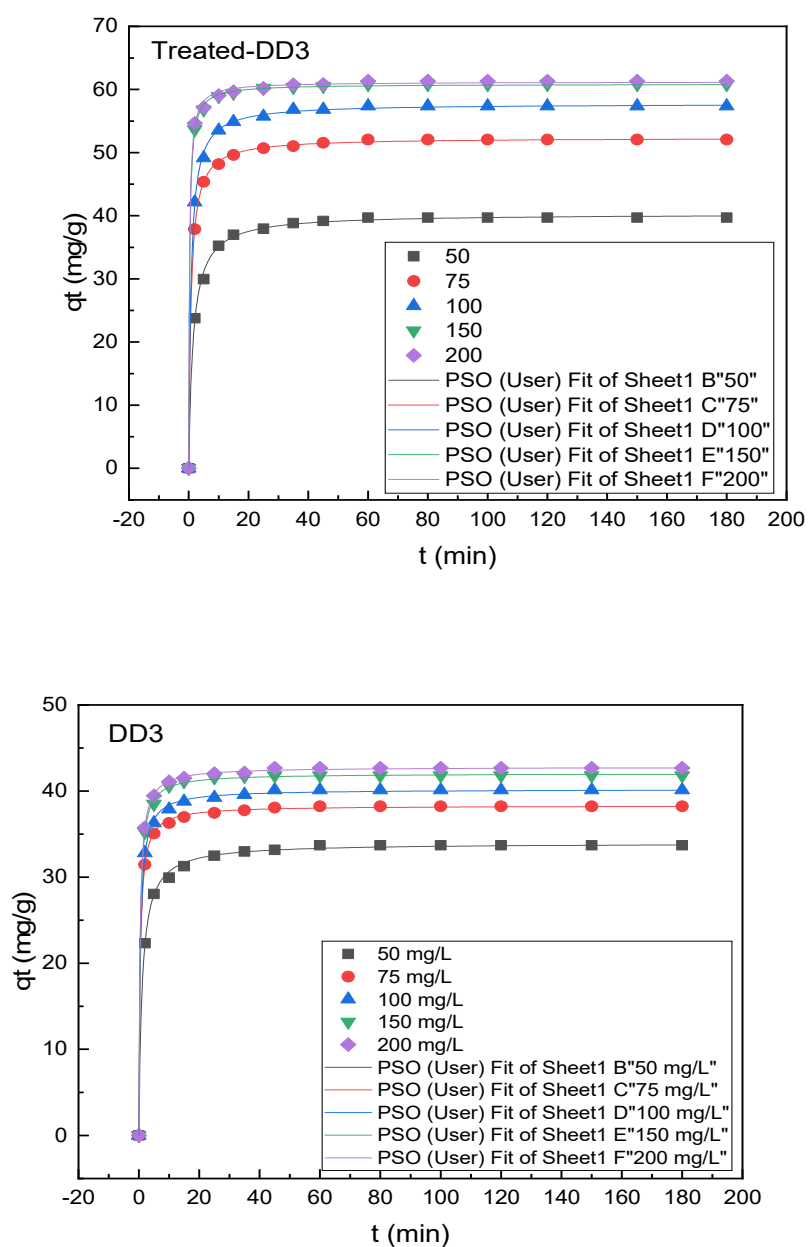

**Figure S4**

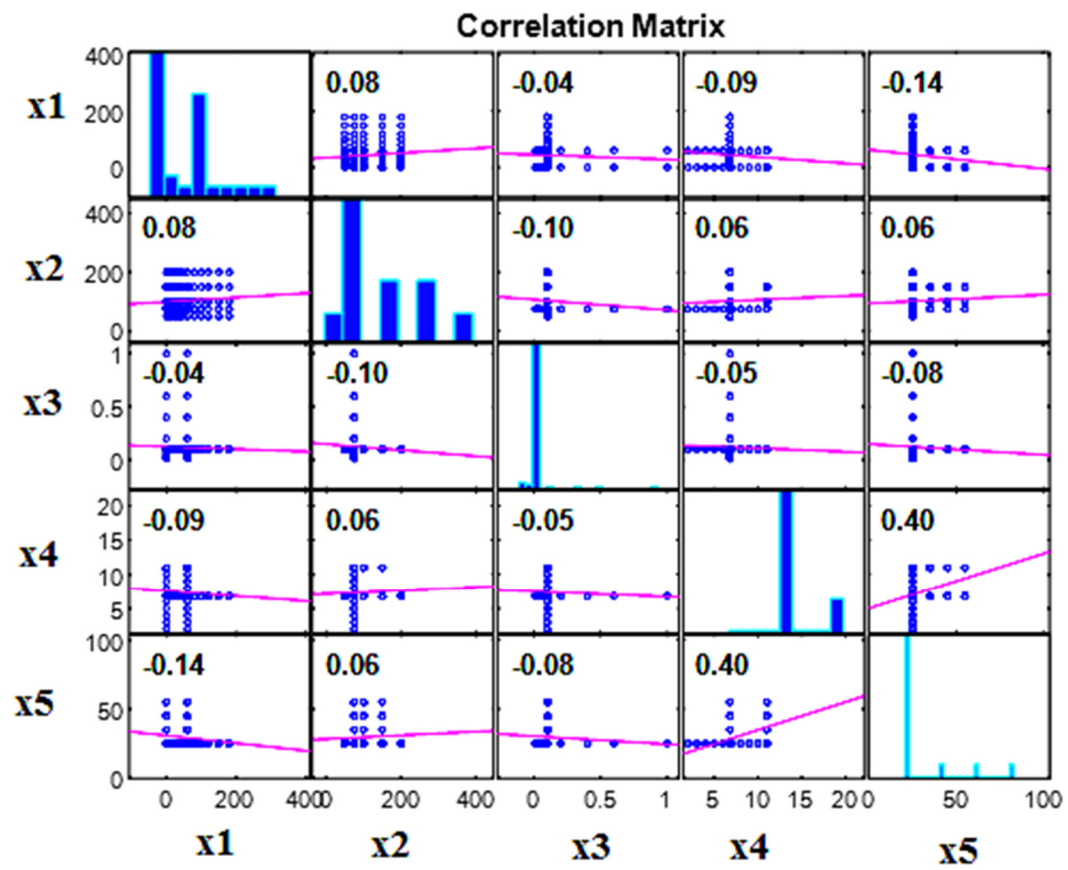

Figure 5

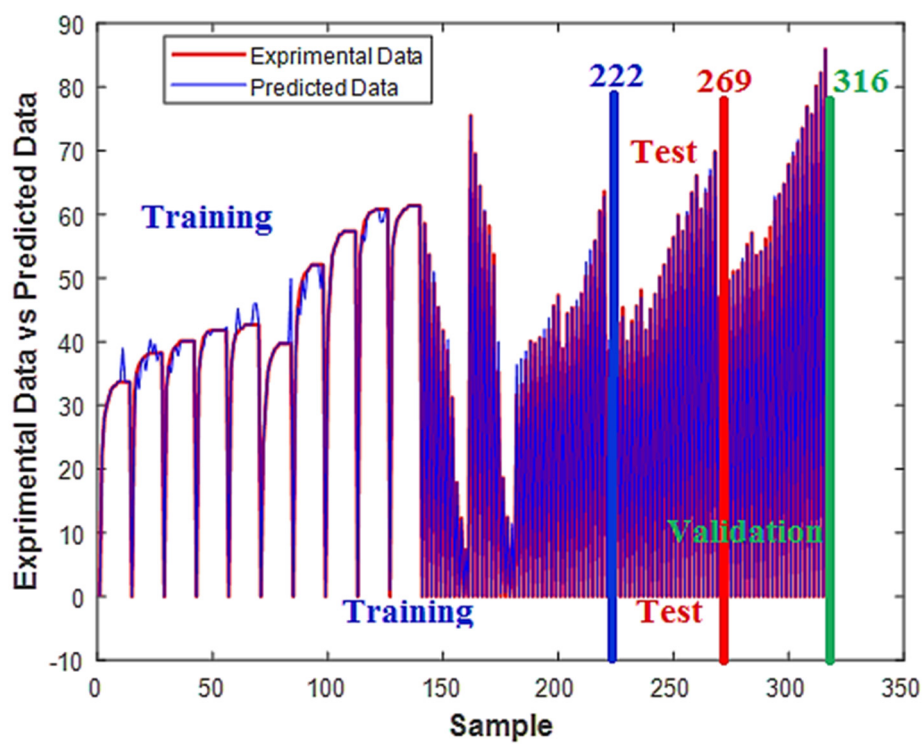

(a)

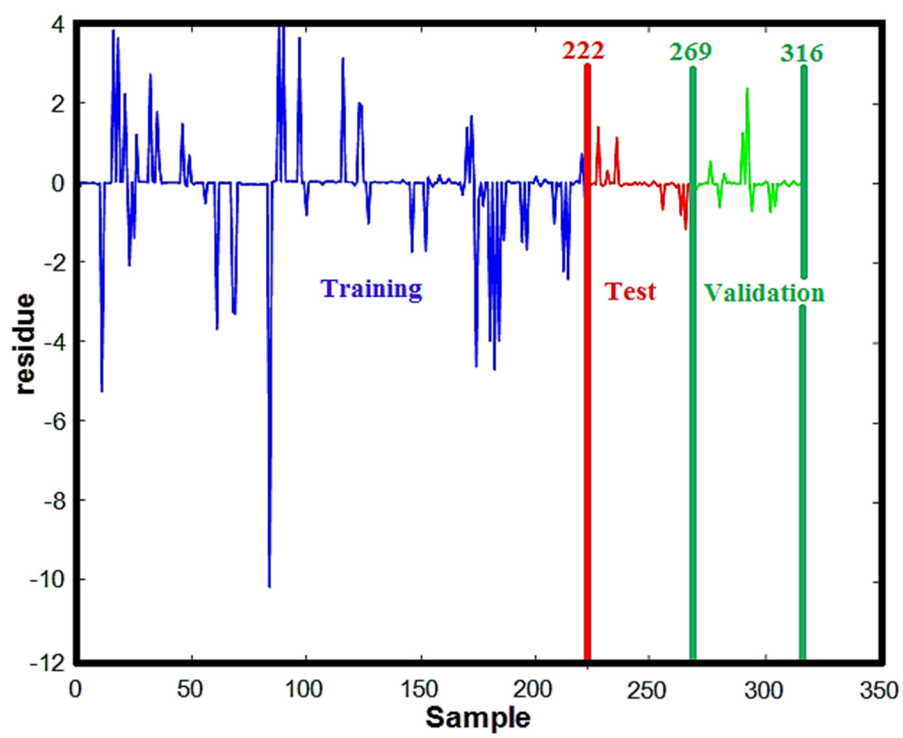

(b)

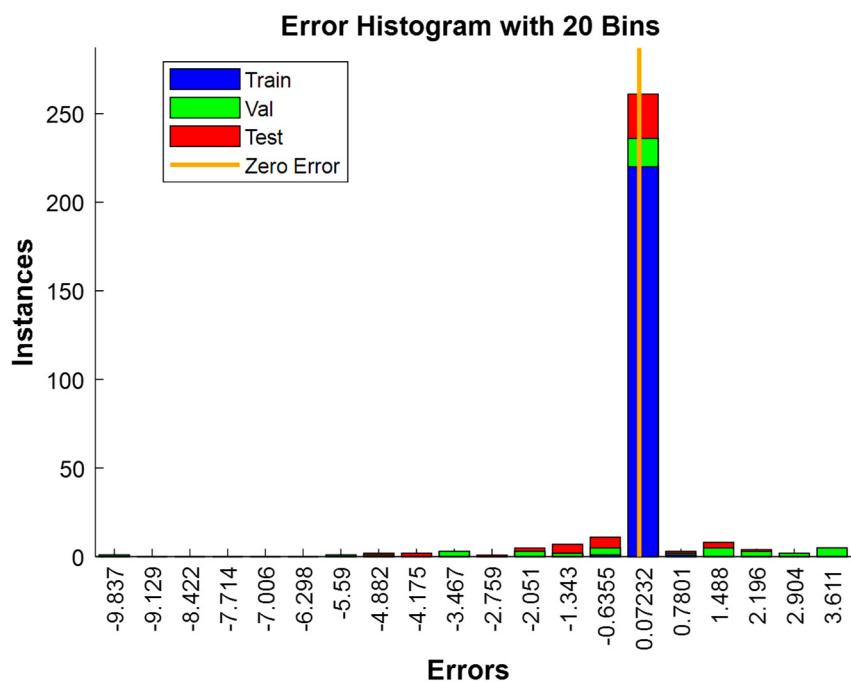

(c)

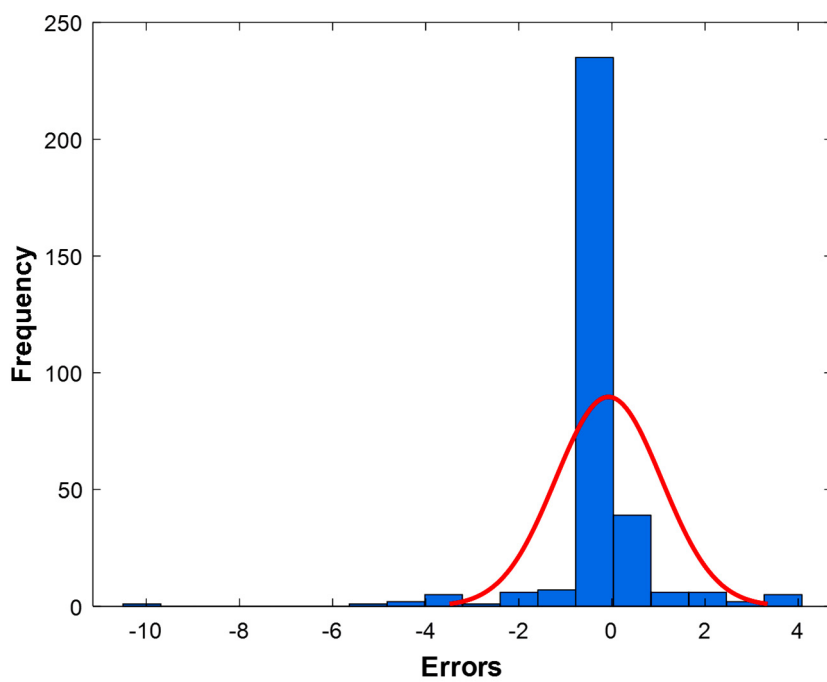

(d)

**Figure S6**

Application\_DD3\_and\_AADD3\_for\_MB\_uptake

## Prediction using GPR\_PSO model

**Note:**

X1: Contact time (min)  
X2: Initial MB concentration (mg/L)  
X3: Mass of adsorbent (g)  
X4: pH  
X5: Temperature (°C)  
X6: Type of adsorbent :  
    To choose DD3, put number "1"  
    To choose AADD3, put number "2"

| Inputs |     |
|--------|-----|
| X1     | 60  |
| X2     | 75  |
| X3     | 0.1 |
| X4     | 11  |
| X5     | 25  |
| X6     | 2   |

**RUN**

GPR\_PSO

Delete all values

CLC

**MB uptake (mg/g), predicted values**

62.8512

**Figure S7**

**Table S1**

| Adsorbents     | Qmax (mg/g) | References                       |
|----------------|-------------|----------------------------------|
| Kaolin KAFE-7  | 42.3        | Fei, F et al. (2020)             |
| Kaolin KT3B    | 52.76       | Mouni, L et al. (2018)           |
| Zeolite 4AZW   | 9.95        | Imessaoudene A. et al (2022)     |
| Persian Kaolin | 29.85       | Tehrani-Bagha, A.R. et al (2011) |
| Geopolymer     | 39.52       | Candamano, S. et al (2023)       |
| Zeolite        | 22.00       | Rida, K. et al. (2013)           |
| 10% GK         | 28.02       | Kai, He et al. (2018)            |
| Treated-DD3    | 64.58       | In this study                    |
